# Supplementary material for: Semiaromatic polyamides with enhanced charge carrier mobility
Source: Royal Society of Chemistry journal article supplement (doi:10.1039/d1py01203g), 2021-01-01

# Semiaromatic Polyamides with Enhanced Charge Carrier Mobility

## Supplementary Information

Bilal Özen,<sup>1</sup> Nicolas Candau,<sup>1</sup> Cansel Temiz,<sup>2</sup> Ferdinand C. Grozema,<sup>2</sup> Grégory Stoclet,<sup>3</sup>  
Christopher J.G. Plummer,<sup>1</sup> Holger Frauenrath<sup>1,\*</sup>

<sup>1</sup> École Polytechnique Fédérale de Lausanne (EPFL)  
Institute of Materials  
Laboratory of Macromolecular and Organic Materials

EPFL-STI-IMX-LMOM  
MXG 037, Station 12  
1015 Lausanne, Switzerland

<sup>2</sup> Delft University of Technology  
Department of Chemical Engineering

<sup>3</sup> Univ. Lille, CNRS, INRAE, Centrale Lille, UMR 8207 - UMET -  
Unité Matériaux et Transformations, F-59000 Lille, France

\* Corresponding Author:  
holger.frauenrath@epfl.ch

## Table of Contents

|                                |   |
|--------------------------------|---|
| 1. Supplementary Figures ..... | 2 |
| 2. NMR Spectra .....           | 4 |

## 1. Supplementary Figures

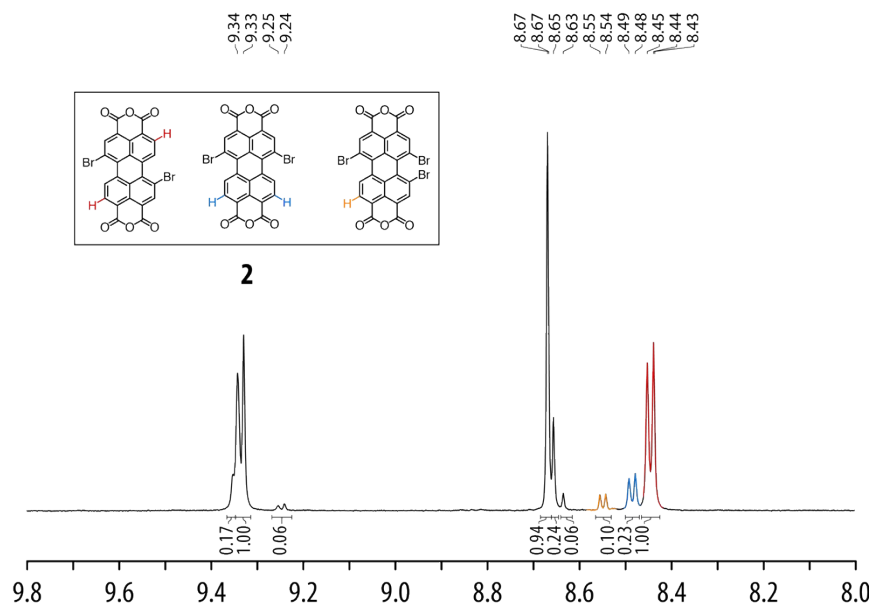

**Supplementary Figure S1.**  $^1\text{H}$  NMR spectrum (600 MHz, calibrated with 4,4-dimethyl-4-silapentane-1-sulfonic acid) of **2** in conc.  $\text{D}_2\text{SO}_4$  indicating the presence of the 1,7-dibromo, 1,6-dibromo, and 1,7,6-tribromo perylene bisimide regioisomers.

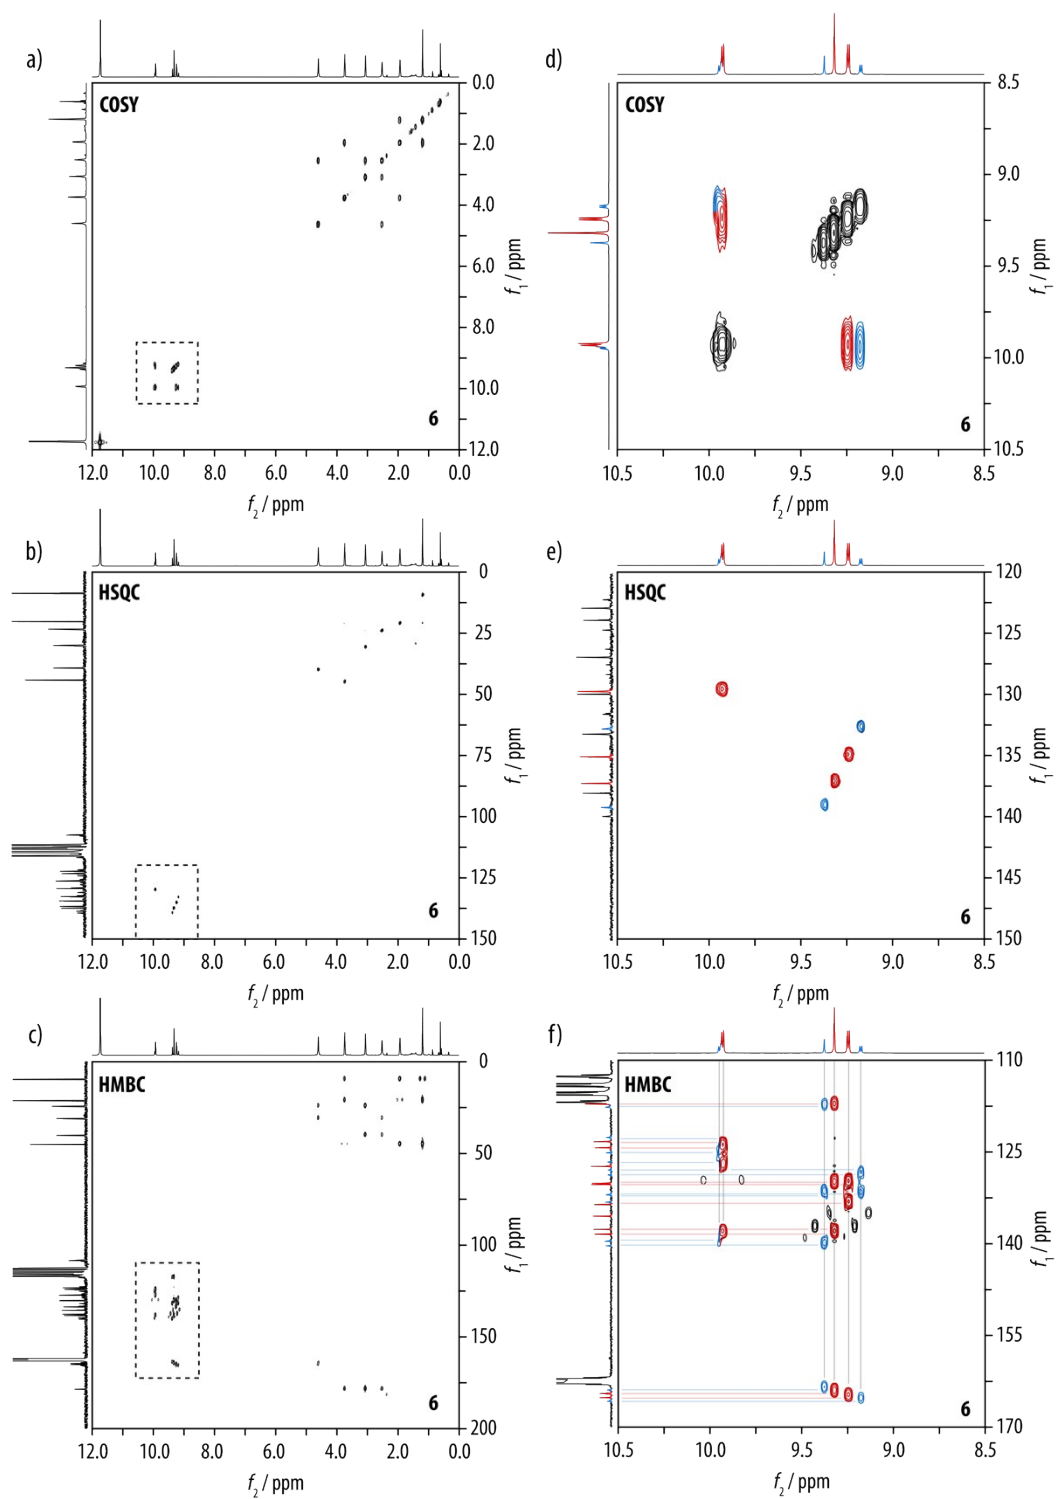

**Supplementary Figure S2.** *a-c*) 2D NMR spectra (800 MHz, TFA-*d*) of the model compound **6** and the corresponding  $^1\text{H}$  and  $^{13}\text{C}$  NMR spectra. *d-f*) Expanded views of the dashed area of the full spectrum in *a-c*) confirmed the presence of 1,6-dicyano regioisomer (blue) as a side product in addition to the 1,7-dicyanoperylene bisimide **6** as the main component (red).

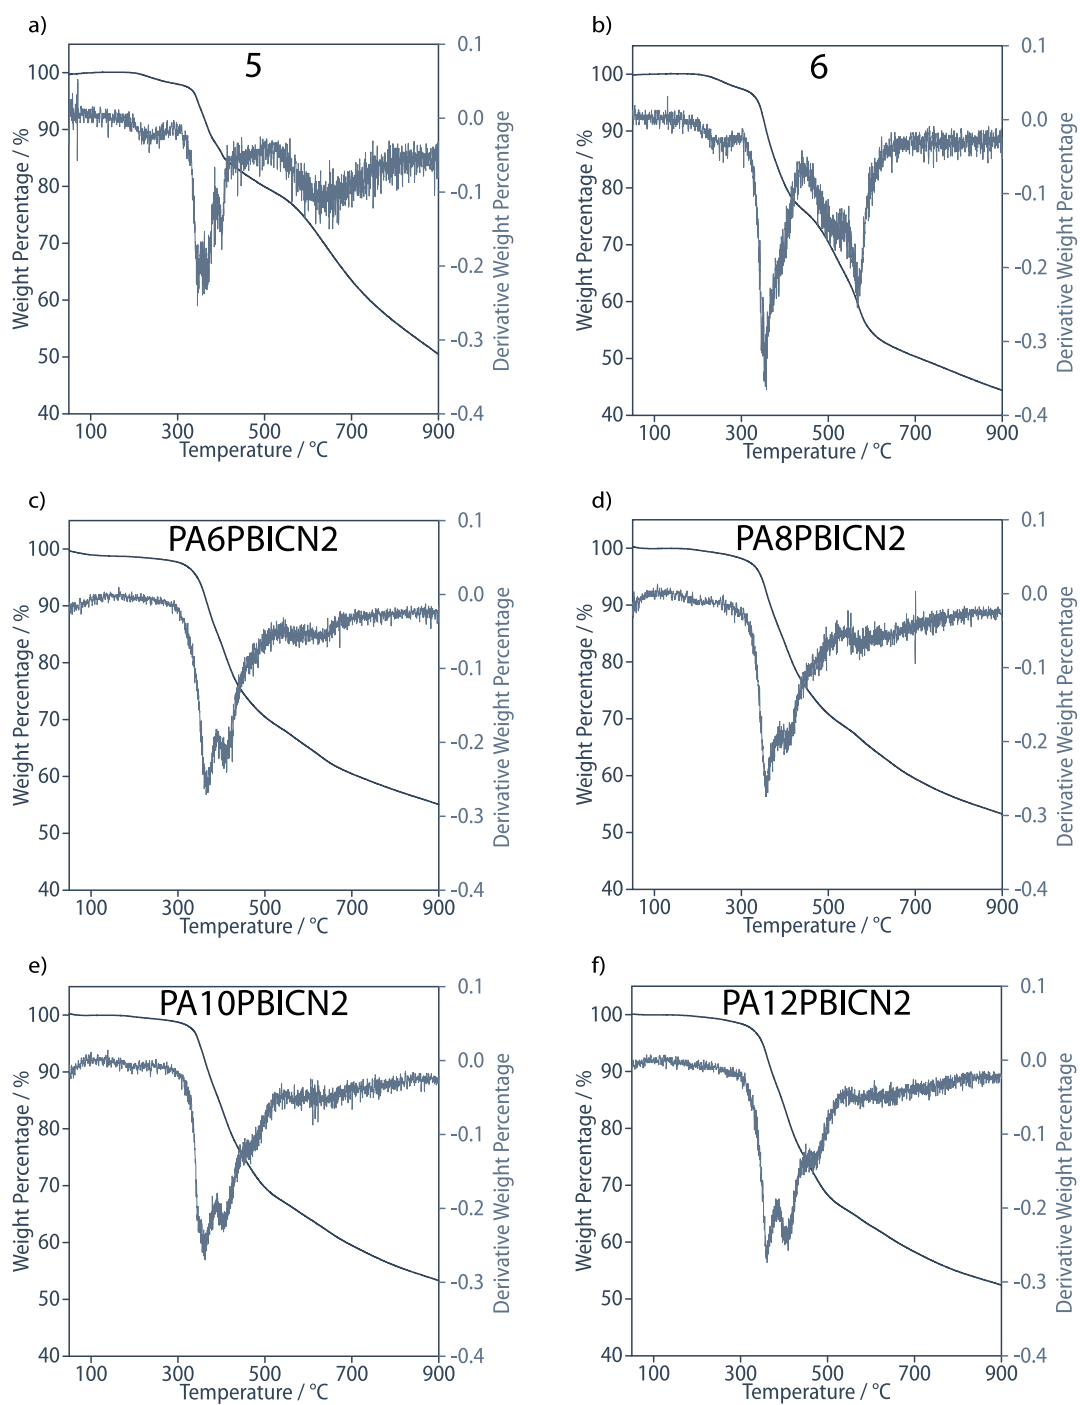

**Supplementary Figure S3.** TGA and derivative plots of a) Monomer 5. b) Model compound 6. c) PA6PBICN2. d) PA8PBICN2. e) PA10PBICN2. f) PA12PBICN2.

## 2. NMR Spectra

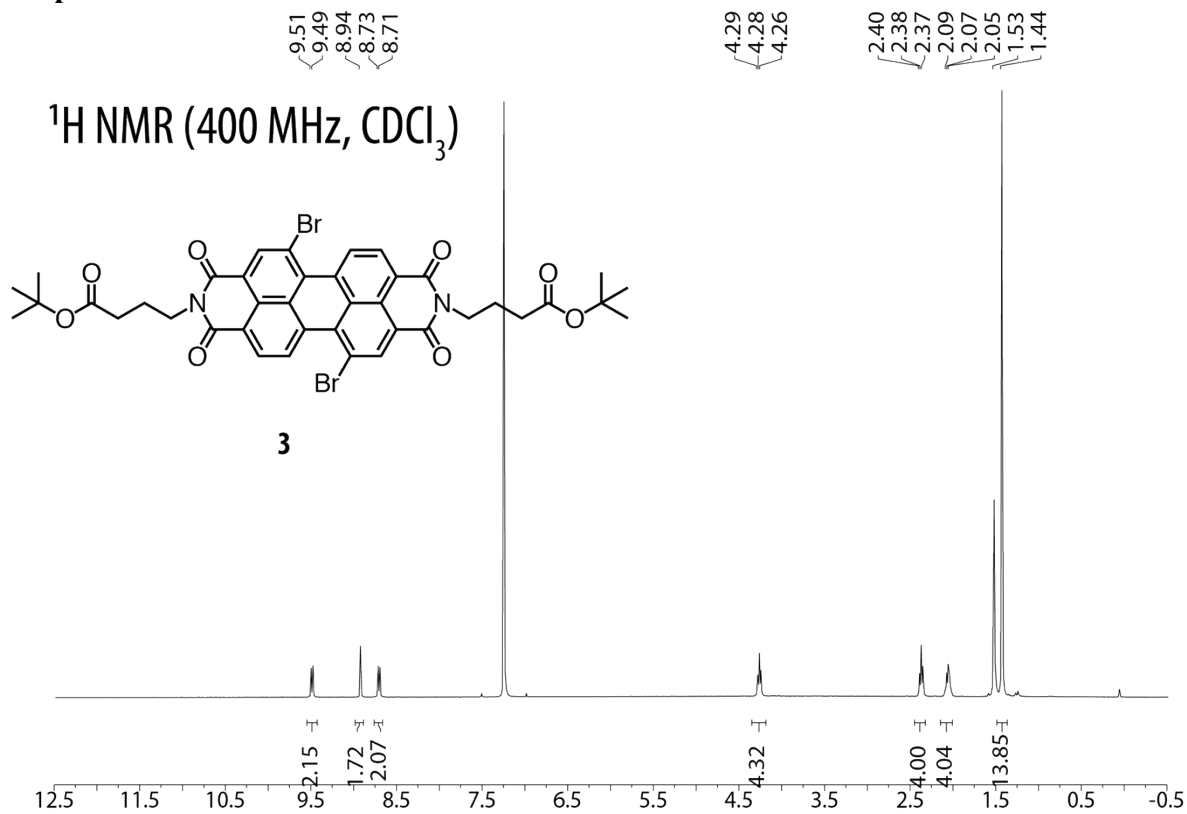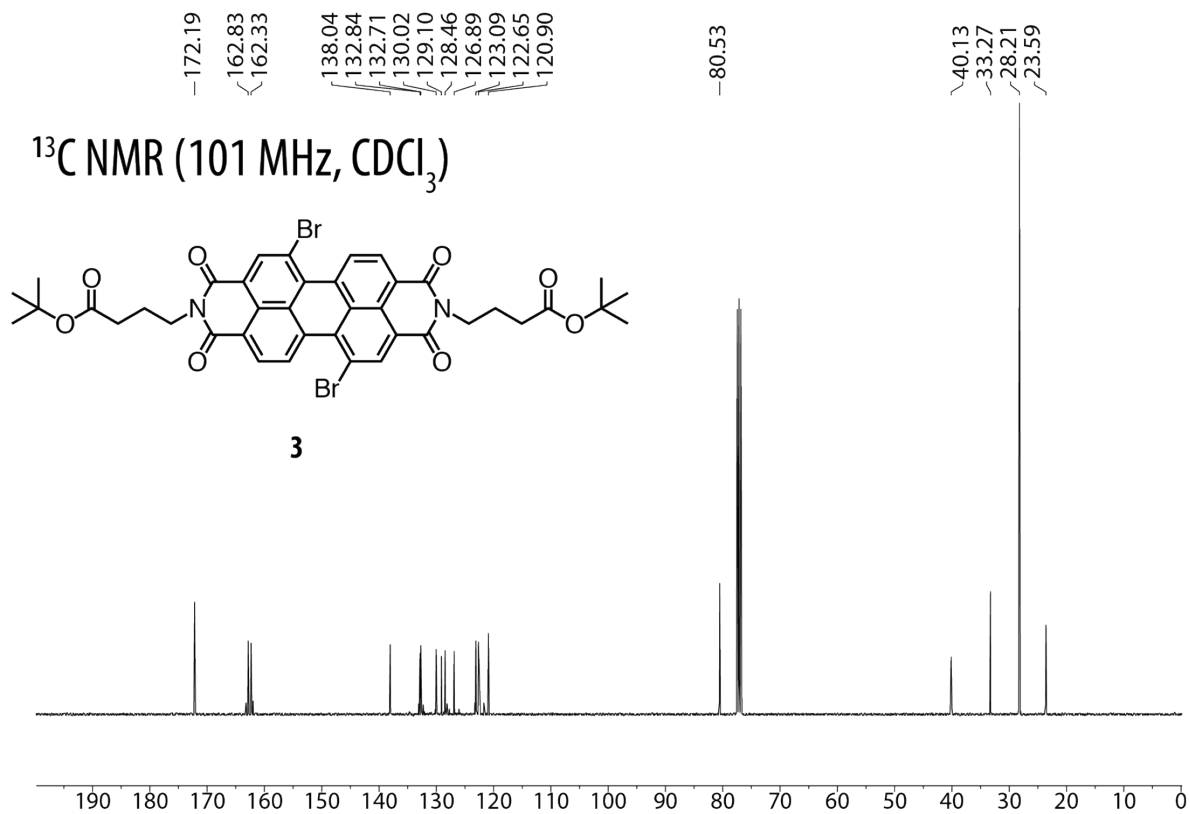

$^1\text{H}$  NMR (400 MHz, TFA- $d$ : $\text{CD}_2\text{Cl}_2=1:3$ )

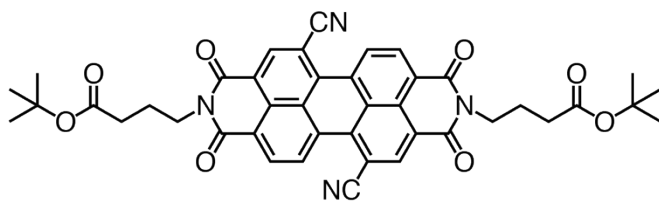

4

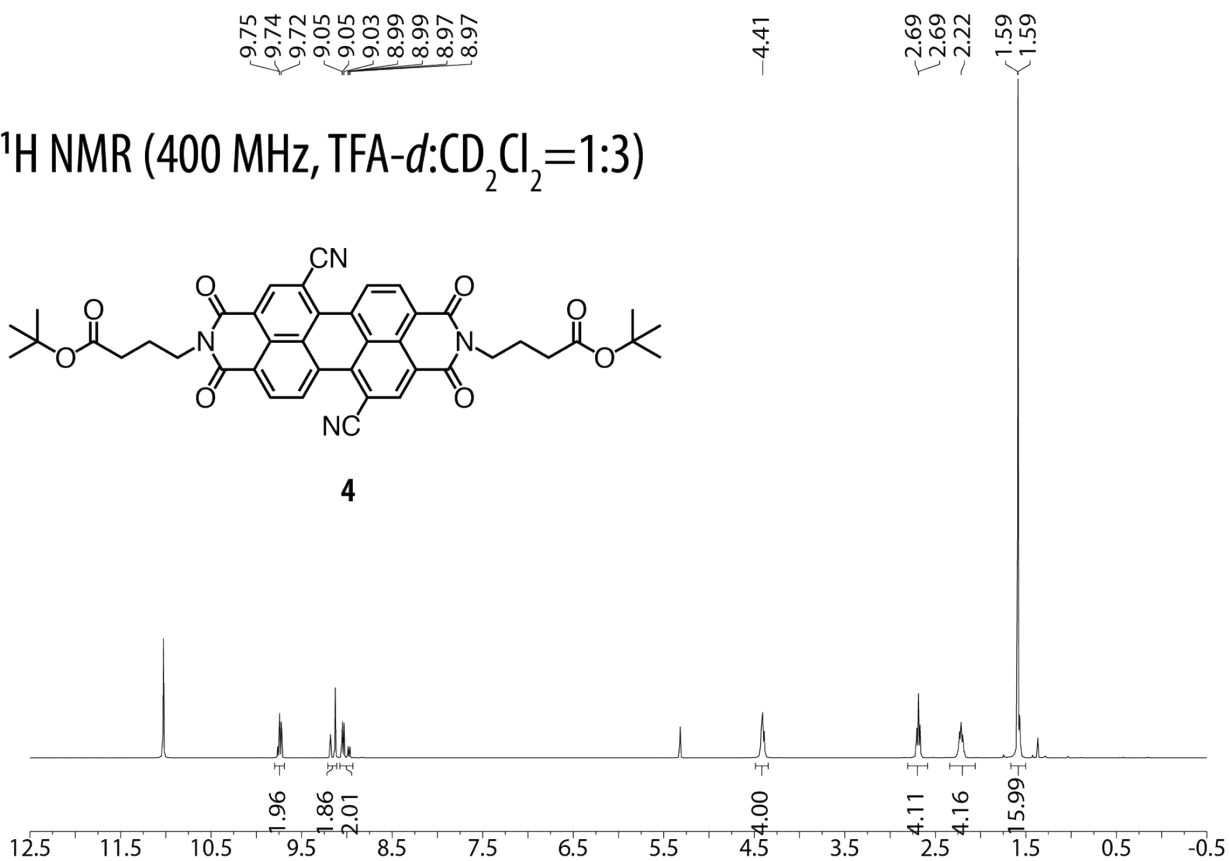

$^{13}\text{C}$  NMR (101 MHz, TFA- $d$ : $\text{CD}_2\text{Cl}_2=1:3$ )

4

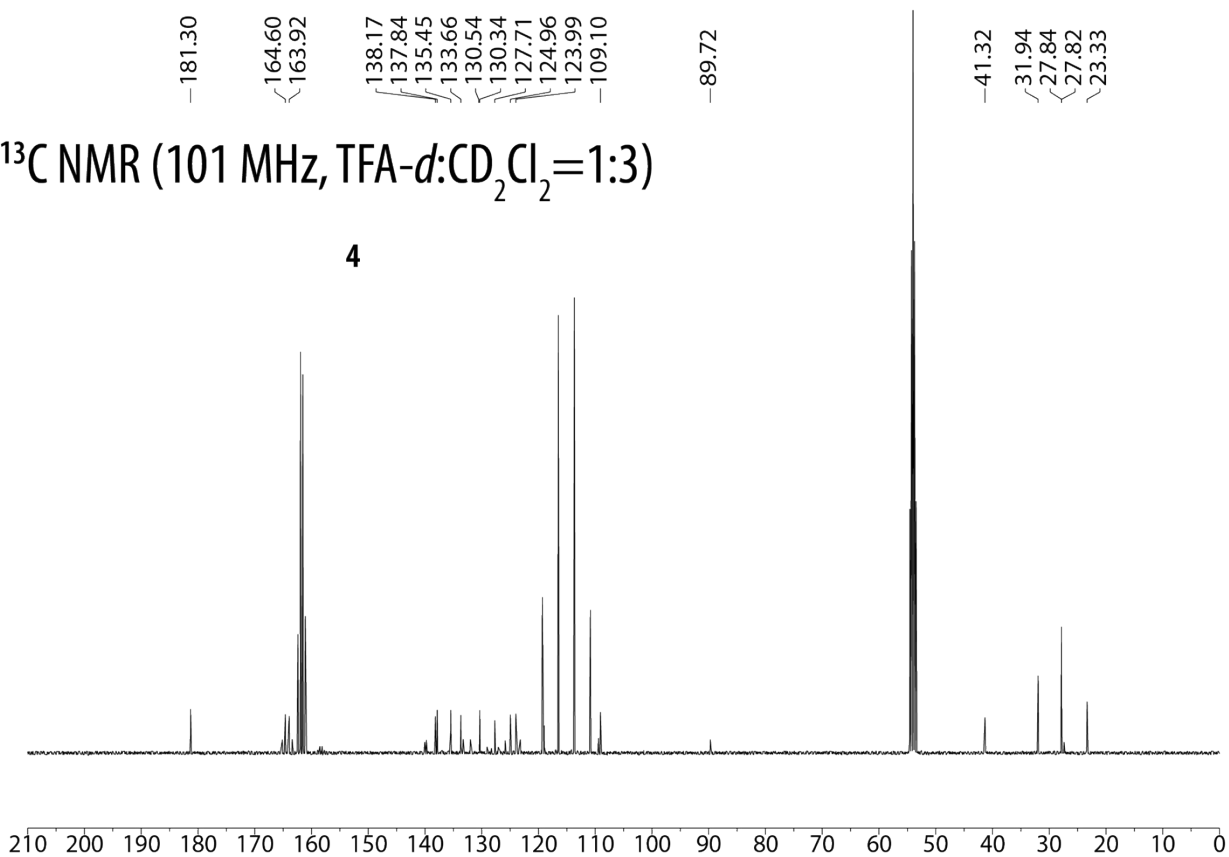

9.78  
9.76  
9.74  
9.22  
9.17  
9.09  
9.07

4.45  
4.44  
4.42

-2.71  
-2.24

$^1\text{H}$  NMR (400 MHz, TFA-*d*: $\text{CD}_2\text{Cl}_2=1:3$ )

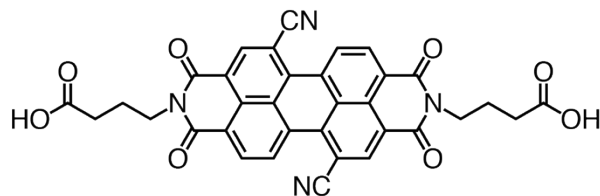

5

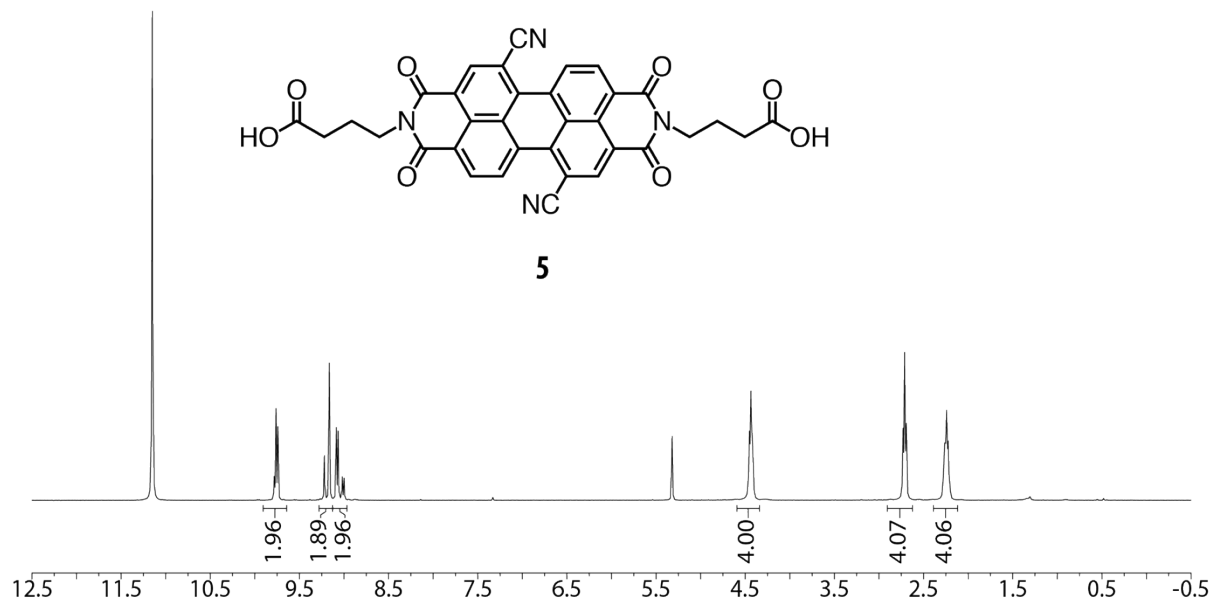

-180.54

163.93  
163.24

137.47  
137.08  
134.74

132.86  
129.73  
129.56

126.85  
124.08  
123.11

-108.14

-40.53

-31.02

-22.42

$^{13}\text{C}$  NMR (101 MHz, TFA-*d*: $\text{CD}_2\text{Cl}_2=1:3$ )

5

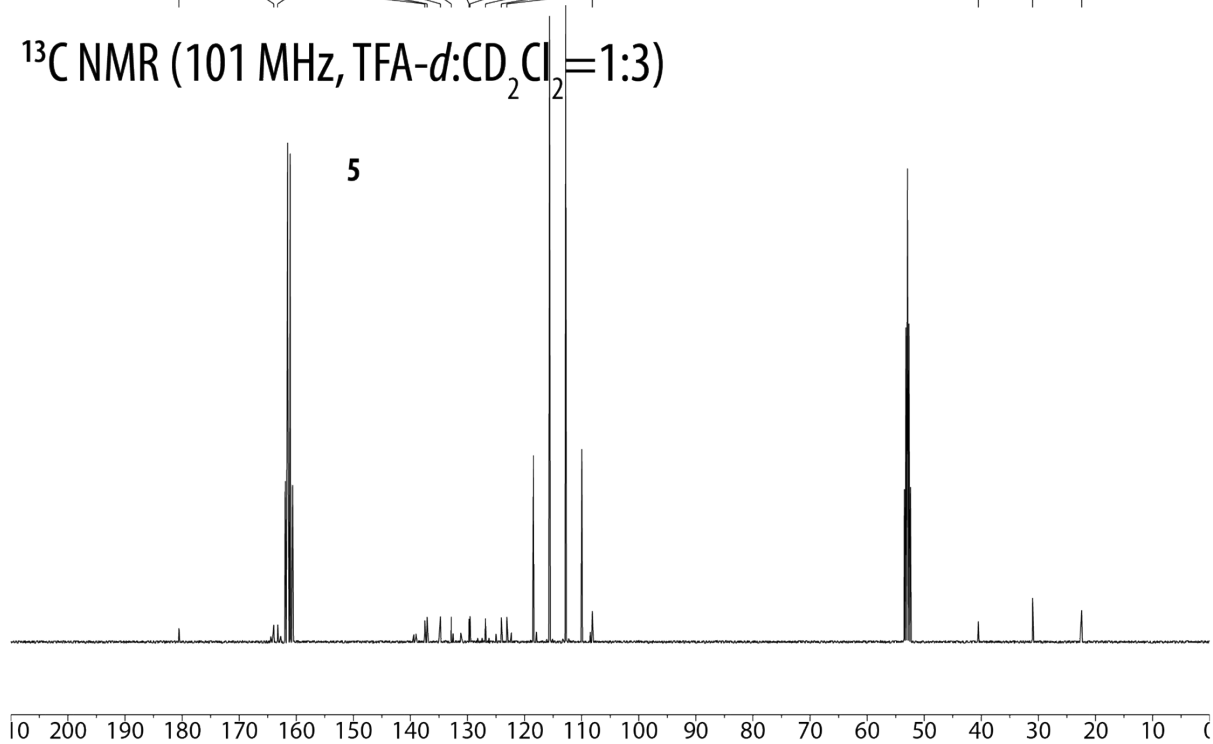



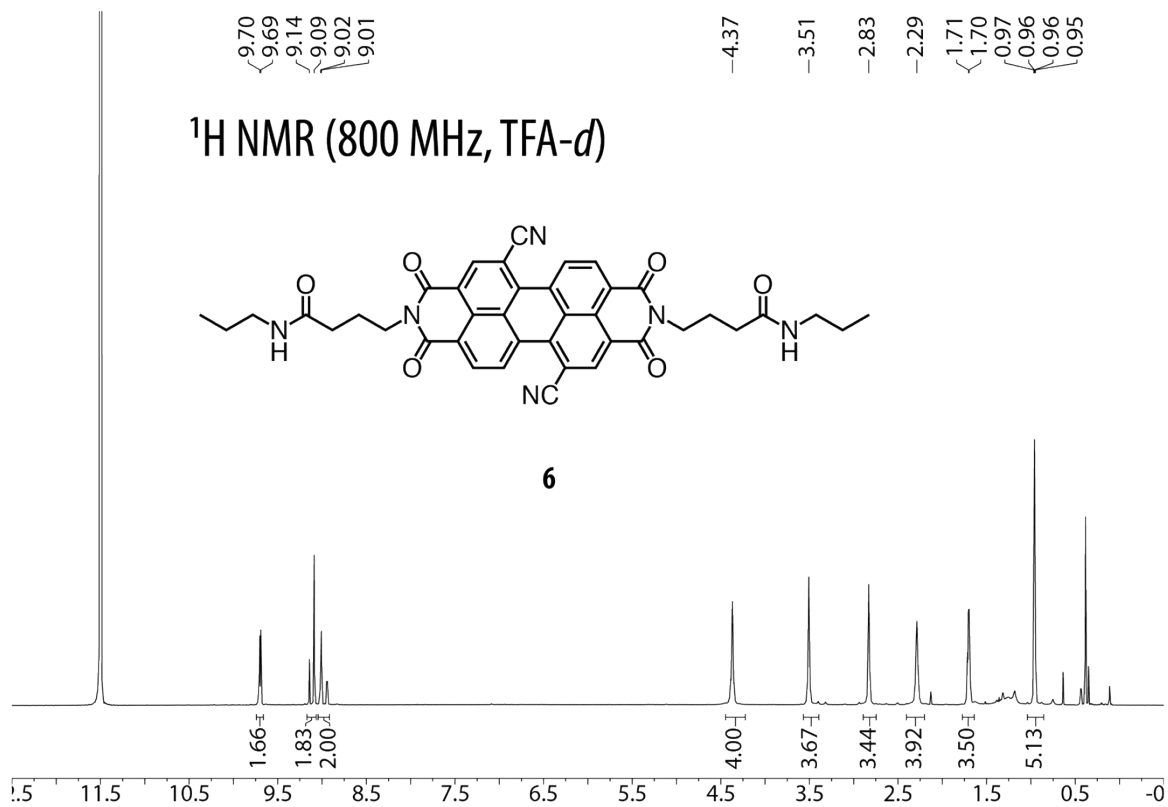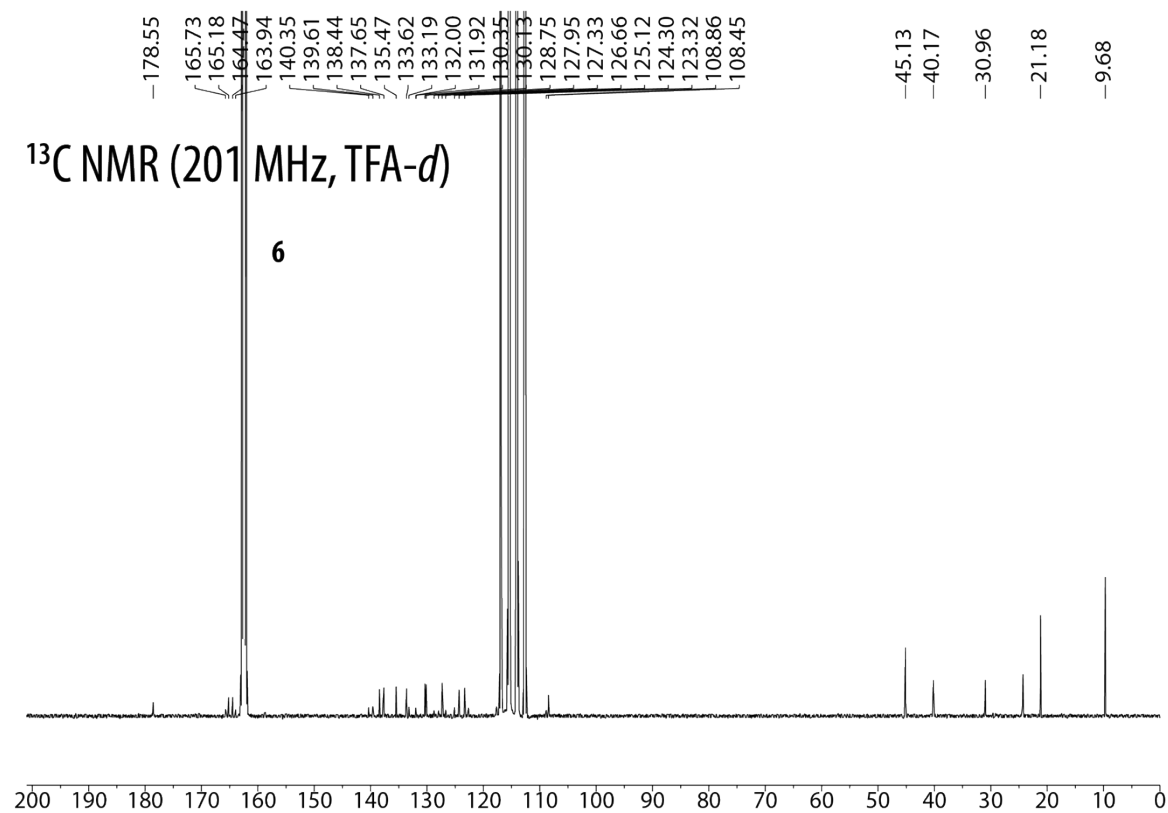

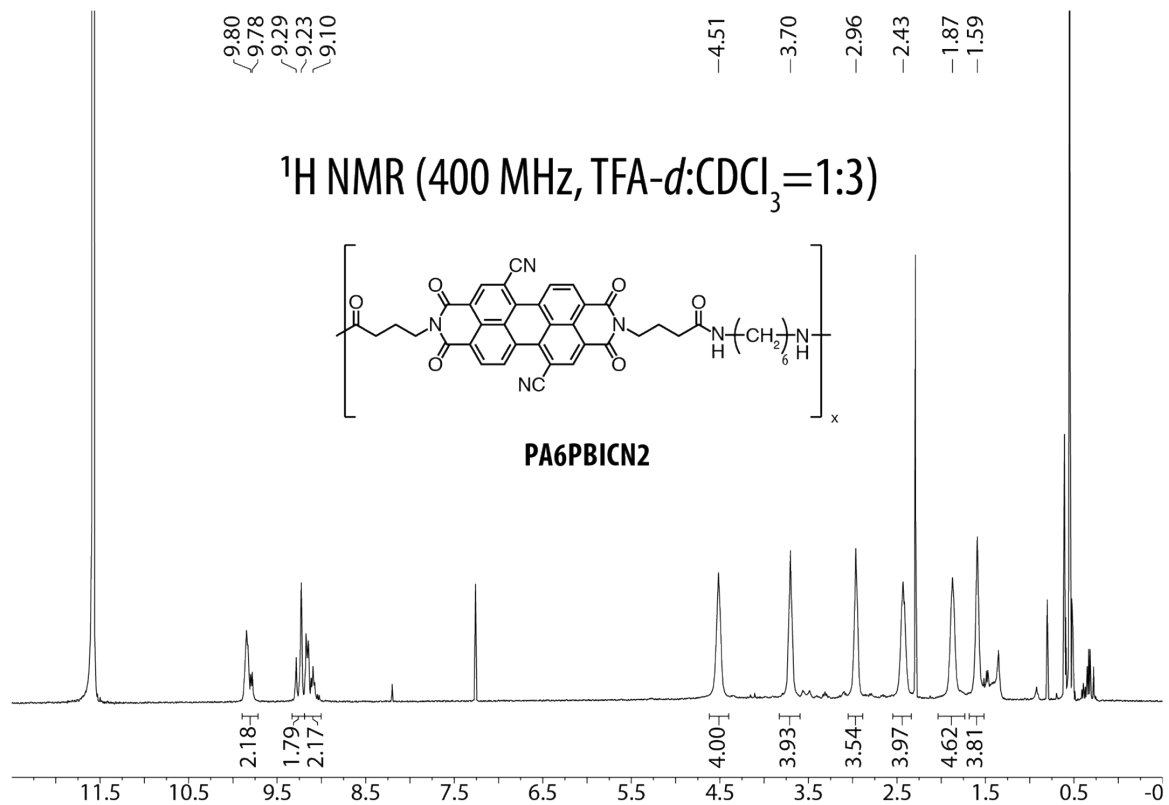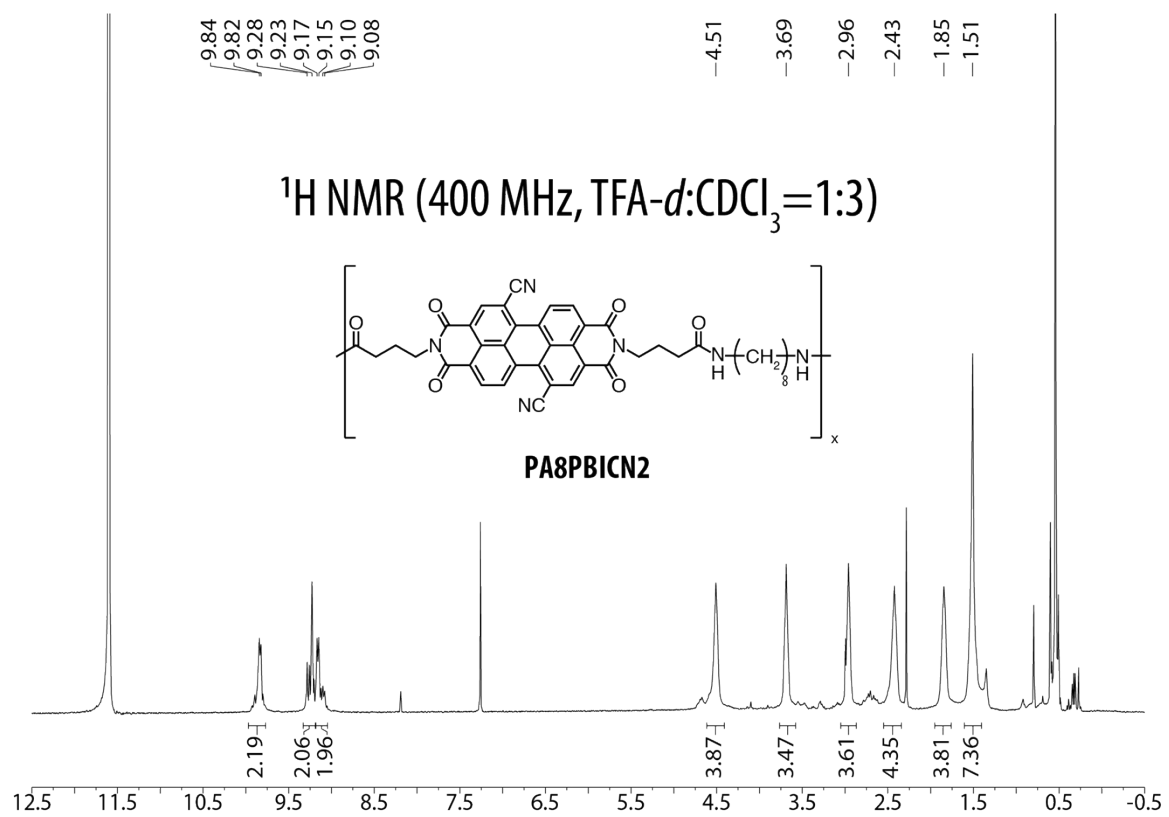

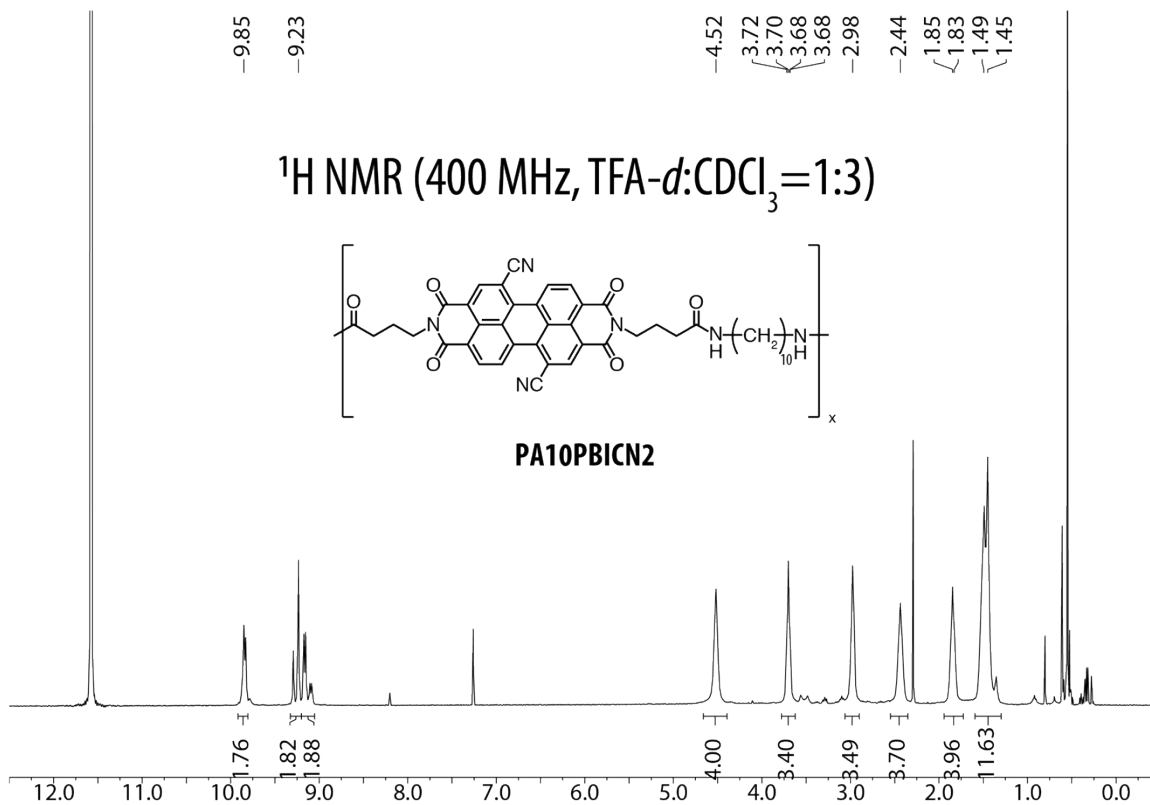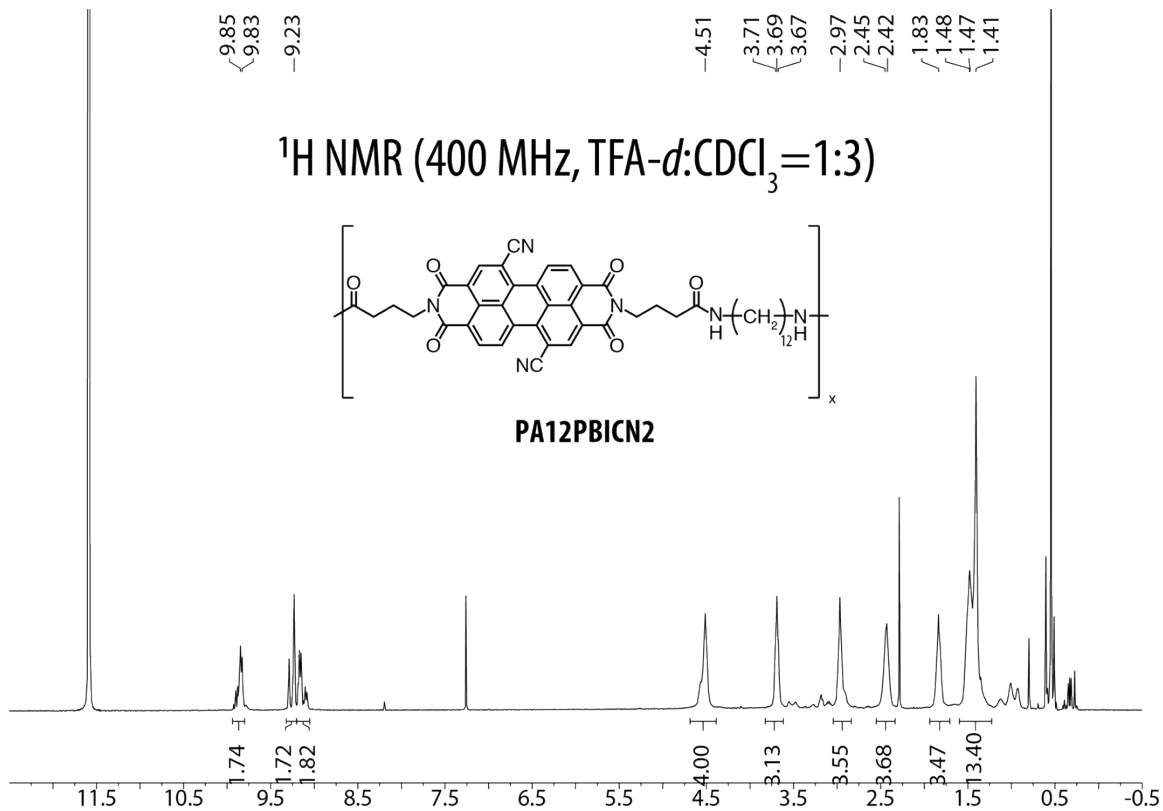

Supplement: d1py01203g1.pdf [file d1py01203g1.pdf]
